# Supplementary material for: Bio-Inspired Micromachined Volumetric Flow Sensor with a Big Dynamic Range for Intravenous Systems
Source: MDPI journal article supplement (doi:10.3390/s23010234), 2022-12-26
Supplement: s1 [file s1]

Article

# Bio-Inspired Micromachined Volumetric Flow Sensor with a Big Dynamic Range for Intravenous Systems

Lansheng Zhang <sup>1</sup>, Yingchen Yang <sup>2</sup>, Georgios A. Bertos <sup>3,4,5</sup>, Chang Liu <sup>6</sup> and Huan Hu <sup>1,7,\*</sup>

<sup>1</sup> ZJU-UIUC Institute, International Campus, Zhejiang University, Haining 314400, China; lansheng.20@intl.zju.edu.cn

<sup>2</sup> Department of Mechanical Engineering, University of Texas Rio Grande Valley, Edinburg, TX 78539, USA; yingchen.yang@utrgv.edu

<sup>3</sup> Department of Physical Medicine and Rehabilitation, Feinberg School of Medicine, Northwestern University Prosthetics Orthotics Center, Chicago, IL 60611, USA; george.bertos@gmail.com or gbertos@central.ntua.gr

<sup>4</sup> School of Mechanical Engineering, National Technical University of Athens, 15780 Athens, Greece

<sup>5</sup> Applied Sciences and Technology, Baxter Healthcare Inc., Round Lake, IL 60073, USA

<sup>6</sup> Institute of Electrics, Chinese Academy of Sciences, Beijing 100089, China; changliu8888@gmail.com

<sup>7</sup> State Key Laboratory of Fluid Power and Mechatronic Systems, Zhejiang University, Hangzhou 310027, China

\* Correspondence: huanhu@intl.zju.edu.cn

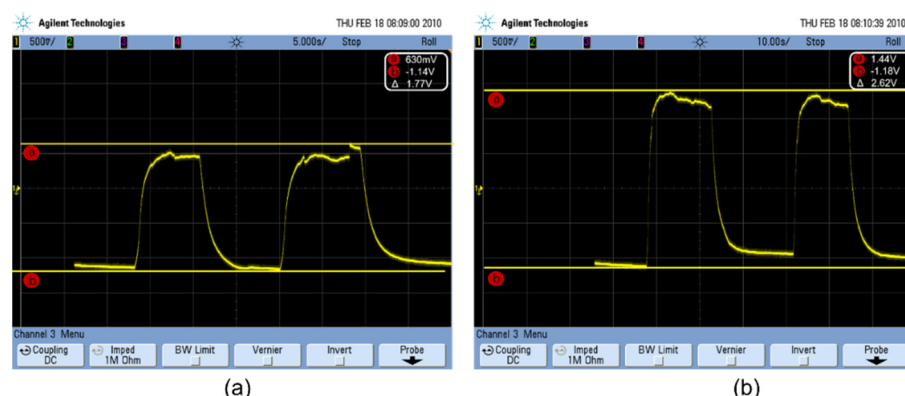

**Figure S1.** Oscilloscope screenshots show the sensor output at a volumetric flow rate of 100 mL/h. and (a) and 200 mL/h (b).

**Table S1.** The abbreviations used in this article and corresponding full names.

| Abbreviation | Full name                       |
|--------------|---------------------------------|
| MEMS         | Micro-Electro-Mechanical System |
| IV           | intravenous                     |
| AHC          | artificial haircell             |
| TSV          | through-silicon via             |
| PCB          | printed circuit board           |
| SOI          | silicon-on-insulator            |
| DRIE         | deep reactive ion etching       |
| BOE          | buffered oxide etchant          |
| IoT          | Internet of Things              |
